# Supplementary material for: Protocol for the Paediatric Otorrhoea Study (POSt): a multi-methods study to understand the burden of paediatric otorrhoea in the UK
Source: PubMed Central journal article supplement (PMC10481712; doi:10.1136/bmjopen-2023-078052), 2023-09-05
Supplement: bmjopen-2023-078052.draft_revisions.pdf [file bmjopen-2023-078052.draft_revisions.pdf]

# BMJ Open

BMJ Open is committed to open peer review. As part of this commitment we make the peer review history of every article we publish publicly available.

When an article is published we post the peer reviewers' comments and the authors' responses online. We also post the versions of the paper that were used during peer review. These are the versions that the peer review comments apply to.

The versions of the paper that follow are the versions that were submitted during the peer review process. They are not the versions of record or the final published versions. They should not be cited or distributed as the published version of this manuscript.

BMJ Open is an open access journal and the full, final, typeset and author-corrected version of record of the manuscript is available on our site with no access controls, subscription charges or pay-per-view fees (<http://bmjopen.bmj.com>).

If you have any questions on BMJ Open's open peer review process please email [info.bmjopen@bmj.com](mailto:info.bmjopen@bmj.com)

# BMJ Open

## The Paediatric Otorrhoea Study (POSt): Understanding the burden of disease and acceptability of non-surgical treatment options

|                               |                                                                                                                                                                                                                                                                                                                                                                                                                                                                                                                                                                                                                                                                                                                                                                                                                                                                                                                           |
|-------------------------------|---------------------------------------------------------------------------------------------------------------------------------------------------------------------------------------------------------------------------------------------------------------------------------------------------------------------------------------------------------------------------------------------------------------------------------------------------------------------------------------------------------------------------------------------------------------------------------------------------------------------------------------------------------------------------------------------------------------------------------------------------------------------------------------------------------------------------------------------------------------------------------------------------------------------------|
| Journal:                      | <i>BMJ Open</i>                                                                                                                                                                                                                                                                                                                                                                                                                                                                                                                                                                                                                                                                                                                                                                                                                                                                                                           |
| Manuscript ID                 | bmjopen-2023-078052                                                                                                                                                                                                                                                                                                                                                                                                                                                                                                                                                                                                                                                                                                                                                                                                                                                                                                       |
| Article Type:                 | Protocol                                                                                                                                                                                                                                                                                                                                                                                                                                                                                                                                                                                                                                                                                                                                                                                                                                                                                                                  |
| Date Submitted by the Author: | 22-Jul-2023                                                                                                                                                                                                                                                                                                                                                                                                                                                                                                                                                                                                                                                                                                                                                                                                                                                                                                               |
| Complete List of Authors:     | Heward, Elliot; The University of Manchester, Division of Infection, Immunity and Respiratory Medicine, School of Biological Sciences, Faculty of Biology, Medicine and Health<br>Dempsey, James; Royal Manchester Children's Hospital<br>Lunn, Judith; Lancaster University<br>Molloy, John; Royal Manchester Children's Hospital<br>Isba, Rachel; Lancaster University<br>Carr, M; The University of Manchester, Division of Pharmacy & Optometry, School of Health Sciences, Faculty of Biology, Medicine and Health<br>Ashcroft, Darren; The University of Manchester, Division of Pharmacy & Optometry, School of Health Sciences, Faculty of Biology, Medicine and Health<br>Hay, Alastair; University of Bristol, Centre for Academic Primary Care, Bristol Medical School: Population Health Sciences<br>Nichani, Jaya; Royal Manchester Children's Hospital<br>Bruce, Iain; Royal Manchester Children's Hospital |
| Keywords:                     | OTOLARYNGOLOGY, Paediatric otolaryngology < OTOLARYNGOLOGY, EPIDEMIOLOGIC STUDIES, QUALITATIVE RESEARCH                                                                                                                                                                                                                                                                                                                                                                                                                                                                                                                                                                                                                                                                                                                                                                                                                   |
|                               |                                                                                                                                                                                                                                                                                                                                                                                                                                                                                                                                                                                                                                                                                                                                                                                                                                                                                                                           |

SCHOLARONE™  
Manuscripts

## Abstract

### Introduction

Paediatric otorrhoea (PO) refers to the leakage of fluid through a perforation in the ear drum, resulting from an infection of the middle ear of a child or young person (CYP). PO frequently results in hearing loss which may lead to developmental delay, restricted communication and reduced educational attainment.

Epidemiological information for PO is largely derived from low-income countries. The aim of this study will be to establish the incidence of PO within the UK and to understand the impact of PO on CYP and their families' everyday lives. It will build the foundations for a randomised controlled trial investigating the best antibiotic treatment for PO.

### Methods and Analysis

The study will consist of two work packages. 1) Data from the Clinical Practice Research Datalink (CPRD), January 2005 to July 2021, will be used to determine the incidence of patient presentations with PO to primary care in the UK. It will also explore the current antimicrobial prescribing practice for PO in primary care. 2) Thirty semi-structured interviews will be conducted with CYP and their parents/carers to help identify the impact of PO on everyday life, the patient journey and how service users define treatment success. Three medical professional focus groups will be used to understand the current management practice, how treatment success is measured and acceptability to randomise patients. Thematic analysis will be used.

### Ethics and dissemination

The Health Research Authority, The Health and Social Care Research Ethics Committee (23/NI/0082) and the CPRD's research data governance panel (22\_002508) reviewed this study. Results will be disseminated at medical conferences, in peer-reviewed journals, via social media and on the sponsor's webpage. The study will co-create a webpage on healthtalk.org, with the Dipex Charity, about PO so to ensure members of the public can learn more about the condition.

## Strengths and Limitations of the Study

- Patient and public involvement has been used to shape the study aims and design.
- The CPRD provides access to anonymised population-based electronic health records from general practices in the UK which will help determine the incidence and antibiotic treatment for paediatric otorrhoea.
- The CPRD database does not include information on medicines prescribed from hospitals.
- Involvement of patients, their parents/carers and medical professionals will provide a range of experiences.
- The qualitative results will identify the most common themes and will not encompass all possible patient or medical professional experiences.

## Introduction

Paediatric otorrhoea (PO) is discharge from a child's ear, that usually results from an infection of the middle ear. The accumulation of pus in the middle ear space causes the tympanic membrane to stretch until it ruptures, with the resultant leakage of foul-smelling discharge from the ear; called Acute Otitis Media with discharge (AOMd). If AOMd persists it can lead to a permanent perforation of the ear drum with chronic discharge. The World Health Organization (WHO) classifies otorrhoea lasting more than two weeks as Chronic Suppurative Otitis Media (CSOM), although various alternative time frames are used in the medical literature <sup>1</sup>.

In routine clinical practice, classification systems for ear infections based on chronicity are not widely adopted by clinicians as they are not considered helpful in guiding management decisions. The presence, or absence, of otorrhoea being considered of greater relevance to treatment decisions. Our study group prefers to use the term Paediatric Otorrhoea (PO) to encompass the single disease process (AOMd and CSOM) as it translates more readily into clinical practice.

It is estimated that PO affects 50 million CYP per year globally <sup>2-4</sup>. PO may cause significant temporary or permanent morbidity in children, most frequently resulting in hearing loss, which may then lead to developmental delay, restricted communication, poor psychosocial development, and reduced educational attainment<sup>1</sup>. The WHO estimates that chronically discharging ears account for over half of hearing disability globally<sup>1</sup>. In addition, significant complications can occur, resulting in temporary or permanent sequelae such as imbalance, facial weakness and brain infections.

1  
2  
3 The psychosocial impact of PO on children and young people (CYP) and their care  
4 givers is poorly understood. Caregiver concern has been shown to be more  
5 prominent than the physical symptoms of PO in the limited published literature <sup>5</sup>.  
6 Public involvement (CYP and their carers) during development of this study was  
7 supported by a National Institute for Health and Care Research (NIHR) Research  
8 Design Service (RDS) public involvement grant (RDSNW3687). Experts-by-  
9 experience described years of recurrent 'smelly' discharge negatively impacting on  
10 education, sporting activities and socialisation. CYP that were affected, as well as  
11 carers, explained that educators and family members seemed to not understand the  
12 condition. Caregivers felt that more effective treatment and quicker referral to  
13 secondary care was required.  
14  
15  
16  
17  
18

19 The aim of this study is to develop high-quality data to form the foundations for a  
20 randomised controlled trial (RCT) investigating the management options for PO. This  
21 will be achieved through the following objectives:  
22  
23

- 24 • determine the incidence and treatment for PO in the UK;
- 25 • improve the understanding of the impact of PO on CYP and carers to ensure  
26 clinically meaningful outcome measures are selected;
- 27 • understand how and why CYP with PO are currently treated and to assess  
28 treatment and randomisation acceptability for CYP, their carers and  
29 healthcare professionals for a future RCT.  
30  
31  
32  
33  
34  
35

## 36 **Methods and Analysis**

### 37 **Study Design**

38 This study will be divided into two work packages to answer the research objectives  
39 (Figure 1).  
40  
41  
42  
43  
44

### 45 **Patient and Public Involvement**

46 This study has co-design and co-production running as a theme throughout. A (RDS)  
47 public involvement grant allowed the involvement of CYP with PO and their  
48 parents/carers during the study design stage. Their suggestions and experiences  
49 helped to shape every aspect of the study design. For example, parents/carers  
50 suggested either virtual meetings or phone calls were preferable to a face-to-face  
51 meeting due to their flexibility around childcare. This feedback is reflected in the  
52 study design.  
53  
54  
55  
56  
57

58 A Patient Advisory Group (PAG) will be formed for the study, which will consist of 4-6  
59 young people/parents/guardians who will meet at 3-to-4-monthly intervals. The goals  
60

of the PAG are to help maintain the patient-focused nature of the work, maintain transparency, guide the design of the interview template and written patient information materials, as well as direct dissemination of the results.

To help determine the most effective methods of research dissemination and to help gain feedback on the design of a subsequent RCT, a study design workshop with public representatives will be conducted in January 2024. During the current study, we will identify and invite experts-by-experience to join the investigative team for the development of the subsequent research.

All members of the public will be supported by the PPI lead before, during and following the study. Training and support will be provided to all service users involved in this research.

## Work Package 1

### Design

Anonymised patient electronic health record data will be sourced from the CPRD. The CPRD contains electronic healthcare records from 1,760 (21% of all) general practices, including over 16 million patients, in the UK<sup>6,7</sup>. Of these patients, approximately 20% are aged under 18 years old<sup>8</sup>. Data will be utilised from the Aurum dataset.

During the study period of interest, 1<sup>st</sup> January 2005 to 31<sup>st</sup> July 2021, CYP aged 16 years and below will be included. Patients will be followed up until: index PO episode, death, date of transfer out of practice, last date of data collection, study end date or their 16th birthday, whichever comes earliest.

We will calculate annual incidence rates for PO categorised by: biological sex assigned at birth, age, geographical location and Index of Multiple Deprivation (IMD). We will generate these estimates by counting the number of cases and divide them by the total person-years at risk. The incidence will be presented as per 1000 person-years with its 95% confidence interval. Antibiotic prescription data (by route and type) will also be examined.

### Outcomes

Primary outcome measure: diagnosis with paediatric otorrhoea

Secondary outcomes measures:

- type and frequency of antibiotic prescriptions for PO;
- frequency of referrals to secondary care ear, nose and throat services.

#### Factors measured:

- biological Sex at Birth
- age
- geographical location
- index of Multiple Deprivation

#### Sample Size

The proposed study is descriptive in design, therefore we do not have specific hypotheses and a formal sample size calculation is not required.

#### Limitations

The major limitations of the database are missing data and coding variation. Incomplete diagnoses, or those coded using free text, will not be identified by the CPRD. To ensure the correct patient presentations were identified an exhaustive list of codes related to PO was generated for the Aurum database (Appendix. CPRD Coding List). Four clinicians reviewed the coding list. Codes were categorised as primary codes (correctly identify patients with otorrhoea), secondary codes (may identify patients with otorrhoea) or irrelevant coding. The secondary list will be used for a sensitivity analysis. Where clinicians disagreed in the coding decision, a consensus was reached following discussion. Codes were classified as secondary codes if there was no majority consensus to whether the code described PO. Codes relating to grommets or tympanostomy tubes were excluded as infection of grommets can also cause otorrhoea. Missing outcome data are not likely to be a major issue since diagnostic codes are binary and therefore indicate the presence or absence of clinical condition.

#### Analysis

Crude overall incidence rates (with 95% confidence intervals) will be estimated. We will also produce internally age- and sex-standardised incidence rates over the duration of the study period. The data will then be structured in an annual time-series format with event counts and 'person-years at risk' aggregated (by year) with stratification by sex, age group and deprivation (IMD) quintile. Mean-dispersion negative binomial regression models will be used to describe the trends in incidence rates over time. The natural logarithm of the denominator (person-years at risk) will be used as an offset in each regression model. To account for potential non-linear trends, calendar time will be modelled using splines or fractional polynomials. Practice-level variation will be examined using multi-level variants of the regression models with practice modelled using random effects. Sensitivity analyses will be

1  
2  
3 undertaken to compare the incidence rates using the primary and secondary coding  
4 lists only.  
5

## 6 7 Work Package 2 8

### 9 10 Study Design 11

12 Semi-structured interviews will be conducted with CYP and their parents/carers, and  
13 focus groups with medical professionals. A semi-structured interview approach has  
14 been chosen due to its interactive and flexible nature, which is useful to capture the  
15 reality of everyday experience. The interview guide for the interviews and focus  
16 groups are expected to evolve following participant responses. Inclusion criteria is  
17 outlined in Table 1.  
18  
19  
20

### 21 22 Sample Size 23

24 The recruitment aim for the patient interviews is 30 interviews or when data  
25 saturation is reached and the minimum number of patients with key demographics  
26 have participated (Table 2). The recruitment aim for the medical professional focus  
27 groups is 24 participants divided over three focus groups. The sample size is  
28 estimated to allow for sufficient representation of the population of patients with PO.  
29 The study aims to capture a wide variety of experiences and practices within the  
30 medical professional cohort. Prior research studies addressing similar clinical  
31 questions and population were considered to reach the proposed sample size<sup>9</sup>. It  
32 also takes into account the cost and time required to undertake 30 patient interviews  
33 and three focus groups.  
34  
35  
36  
37  
38

### 39 40 Recruitment 41

#### 42 43 Patient Interviews 44

45 Patient recruitment will use a direct-to-patient method by advertising the study using  
46 posters in medical establishments (e.g. GP practices and hospital outpatient waiting  
47 rooms), online (e.g. charities, societies and institutions) and on social media.  
48  
49

50 The poster advertisement will direct the patient or carer to contact the research team  
51 by text, call or email. Recruitment will take place via a single institution. After the  
52 patient contacts the research team and expresses an interest in participating the  
53 cover letter, parent or carer information sheet and age-appropriate patient  
54 information sheet (PIS) will be sent to the participant.  
55  
56  
57  
58  
59  
60



1  
2  
3 The patient and parent/carer will be given the opportunity to read the study material  
4 to determine if they would like to participate. There will be a minimum of two days  
5 between sending the information material to the patient and arranging an interview.  
6  
7

8 In acknowledgement of participants' valuable time, they will be remunerated with a  
9 gift £25 voucher in line with the NIHR guidelines for public involvement remuneration  
10 <sup>10</sup>. Participants will be offered to be informed of the research findings.  
11  
12

### 13 14 Medical Professional Focus Groups 15

16 Recruitment will use a direct-to-participant advertisement. A poster advertising the  
17 study will be sent for distribution through professional bodies, medical institutions  
18 and to primary and secondary care settings. The study poster will direct medical  
19 professionals to contact the research team to take part. Once they contact the  
20 research team, they will be sent the medical professional cover letter and PIS and  
21 booked onto a focus group session.  
22  
23

24  
25 All participants will be offered to be informed of the research findings and will be  
26 acknowledged individually in publications produced from this work.  
27  
28

### 29 30 Consent 31

32  
33 Informed consent will be obtained prior to the participants undergoing any study  
34 related activities. The qualitative researcher will lead the consent discussion with all  
35 participants and will have up-to-date GCP training.  
36  
37

38 To improve dissemination of the research findings, the study team is working with the  
39 Dipex charity to create a webpage on <https://healthtalk.org> where information about  
40 PO can be shared publicly. The qualitative researcher will invite patients (CYP and  
41 their parents/carers) to be involved by contributing short clips of their video recording,  
42 audio recording or a transcript of their interview to the web page. Participating in this  
43 aspect of the study is optional and does not preclude the patients from taking part in  
44 the study.  
45  
46  
47

### 48 49 Data Collection 50

#### 51 52 Patient interviews 53

54  
55 Interviews are expected to last between 45-60 minutes, but the length of the  
56 interview will be guided by the participant. The patient's age at the time of interview  
57 and sex will be collected from the patient or parent/carer.  
58  
59  
60

1  
2  
3 Parents/carers will be invited to take part in the interview on behalf of children  
4 younger than 5 years old. CYP who are 5 years or older will be invited to participate  
5 in joint interviews with their parents/carers, to recognise the importance of their  
6 experiences.  
7  
8  
9

10 The study aims to reduce barriers to participation by using interpreters in the study.  
11 Sign language interpreters will be available for virtual or face-to-face interviews if  
12 required. An interpreter will be used for non-English-speaking participants. The  
13 interpreter will be used for patient consent and interview. Written material will be  
14 translated into any language for up to 6 participants if required. This number is based  
15 on the proportion of non-English speaking people in England and Wales. Translation  
16 will be performed depending on patient preference. Where possible, to improve the  
17 interview dynamic, the interpreter and the interviewer will be in the same location if a  
18 virtual interview is taking place. Interviews involving an interpreter will be allocated  
19 additional time to allow for translation time.  
20  
21  
22  
23  
24

#### 25 Medical Professional Focus Groups

26  
27  
28 Semi-structured focus groups will be conducted with groups consisting of 6-8  
29 participants. Nurses, audiologists, allied medical professionals, GPs, Emergency  
30 Department and Otolaryngology doctors will be invited to participate. Healthcare  
31 professionals from varied demographic locations and of different grades will be  
32 invited to take part in the study. Focus groups will last for up to 60 minutes.  
33  
34  
35

#### 36 Data Analysis

37  
38 Audio recording will be transcribed verbatim. The anonymised transcriptions will be  
39 imported to qualitative data analysis software for data management. Thematic  
40 analysis will follow guidance provided by Braun and Clarke (2006) who suggest the  
41 five key stages of thematic analysis include: (1) familiarizing with the data (2)  
42 generating codes (3) identifying themes (4) reviewing themes and collating into a  
43 thematic map or matrix (5) write up the findings<sup>11</sup>. We will also refer to Braun and  
44 Clarke's (2021) recent assessment guidelines for evaluating thematic analysis  
45 research quality to ensure a well-developed and justified analysis, and to avoid the  
46 most common problems with this approach ('proceduralism' or a non-reflexive  
47 grouping of themes)<sup>12</sup>. There will be multiple independent coders drawn from the  
48 research team, as well as inter-rater reliability measures applied to the iterative  
49 process from codes to themes<sup>11,13</sup>. The researchers will read and re-read the  
50 transcript to familiarise themselves with the data. Codes will then be generated in a  
51 systematic manner across the data set. Subsequently, the codes will be collated into  
52 potential themes which will then be reviewed and refined. Two researchers will  
53 independently identify themes before discussion in order to reach consensus.  
54  
55  
56  
57  
58  
59  
60

## Ethics and Dissemination

The Clinical Practice Research Datalink (CPRD) protocol was approved by the CPRD's research data governance process (22\_002508) on 4 April 2023. The qualitative study was approved by The Health Research Authority on 23 June 2023 and The Research Ethics Committee (REC 23/NI/0082) on 15 June 2023.

This study will work with PAG members, service users involved in the study workshop and the Dipex charity to formulate an engagement plan to ensure the research findings are heard by the relevant audience. We will develop online public resources on [healthtalk.org](https://www.healthtalk.org) with the Dipex charity about PO. We aim to empower PAG members to help disseminate the research outcomes via local networks and online forums. Results will be disseminated to medical professionals at conferences, in peer-reviewed journals and via social media.

## References

1. World Health Organization. Chronic suppurative otitis media. Burden of illness and management options. Available: <https://apps.who.int/iris/handle/10665/42941> [Accessed 22 July 2023]
2. Little P, Gould C, Williamson I, *et al.* Pragmatic randomised controlled trial of two prescribing strategies for childhood acute otitis media. *BMJ* 2001;10:336-42. doi: 10.1136/bmj.322.7282.336
3. Monasta L, Ronfani L, Marchetti F, *et al.* Burden of disease caused by otitis media: systematic review and global estimates. *PLoS One*. 2012;7:e36226. doi: 10.1371/journal.pone.0036226
4. Amnesty International. Children's Human Rights. Available: <https://www.amnesty.org/en/what-we-do/child-rights/> [Accessed 22 July 2023]
5. Vlastos IM, Kandiloros D, Manolopoulos L, *et al.* Quality of life in children with chronic suppurative otitis media with or without cholesteatoma. *Int J Pediatr Otorhinolaryngol*. 2009;73:363-9. doi: 10.1016/j.ijporl.2008.10.030
6. Clinical Practice Research Datalink. (2022). CPRD Aurum March 2022 (Version 2022.03.001) [Data set]. Clinical Practice Research Datalink. <https://doi.org/10.48329/MY9S-4X08>
7. Clinical Practice Research Datalink. (2022). CPRD GOLD March 2022 (Version 2022.03.001) [Data set]. Clinical Practice Research Datalink. <https://doi.org/10.48329/5RHX-ER29>

- 1
  - 2
  - 3
  - 4
  - 5
  - 6
  - 7
  - 8
  - 9
  - 10
  - 11
  - 12
  - 13
  - 14
  - 15
  - 16
  - 17
  - 18
  - 19
  - 20
  - 21
  - 22
  - 23
  - 24
  - 25
  - 26
  - 27
  - 28
  - 29
  - 30
  - 31
  - 32
  - 33
  - 34
  - 35
  - 36
  - 37
  - 38
  - 39
  - 40
  - 41
  - 42
  - 43
  - 44
  - 45
  - 46
  - 47
  - 48
  - 49
  - 50
  - 51
  - 52
  - 53
  - 54
  - 55
  - 56
  - 57
  - 58
  - 59
  - 60
8. Wolf A, Dedman D, Campbell J, *et al.* Data resource profile: Clinical Practice Research Datalink (CPRD) Aurum. *Int J Epidemiol.* 2019;48:1740-1740g. doi: 10.1093/ije/dyz034
9. Vasileiou K, Barnett J, Thorpe S, *et al.* Characterising and justifying sample size sufficiency in interview-based studies: systematic analysis of qualitative health research over a 15-year period. *BMC Med Res Methodol.* 2018;18:148. doi: 10.1186/s12874-018-0594-7
10. NIHR. Payment guidance for researchers and professionals. Available: <https://www.nihr.ac.uk/documents/payment-guidance-for-researchers-and-professionals/27392> [Accessed 22 July 2023]
11. Braun V, Clarke V. Using thematic analysis in psychology. *Qualitative research in psychology.* 2006;3:77-101. Doi: 10.1191/1478088706qp063oa
12. Braun V, Clarke V. *Thematic Analysis: A Practical Guide.* Sage publications, 2021
13. Braun V, Clarke V. One size fits all? What counts as quality practice in (reflexive) thematic analysis?. *Qualitative research in psychology.* 2021;18:328-52. Doi: 10.1080/14780887.2020.1769238

#### Authors Contributions

Study conception and overall study design (EH & IAB). Design of the public engagement elements (JD & JN) Design of work package 1 (MC, DA & AH). Design of work package 2 (JL, RI & JM). EH and JD drafted the manuscript which was reviewed by all authors.

#### Funding statement

This work was supported by the National Institute of Health and Care Research (NIHR) grant number NIHR204036. DMA is supported by the NIHR Greater Manchester Patient Safety Research Collaboration (PSRC).

#### Competing Interests

No completing interests declared.

Word Count: 2451

## Tables

Table 1. Inclusion and Exclusion Criteria

| <b>Inclusion Criteria</b>         |                                                                                                                                                                                                                                                                                                                                                                                                                      |
|-----------------------------------|----------------------------------------------------------------------------------------------------------------------------------------------------------------------------------------------------------------------------------------------------------------------------------------------------------------------------------------------------------------------------------------------------------------------|
| Patient Interviews                | <ul style="list-style-type: none"> <li>• Children and young people aged 16 years and under</li> <li>• Children and young people who have had otorrhoea in the past year</li> <li>• Caregiver legally able to give consent for the CYP or the CYP themselves has the capacity to consent</li> <li>• Live in the United Kingdom (UK)</li> <li>• All languages (up to six non-English-speaking participants)</li> </ul> |
| Medical Professional Focus Groups | <ul style="list-style-type: none"> <li>• Medical professionals with experience of caring for CYP with otorrhoea in their clinical practice</li> <li>• Currently practicing in the UK</li> <li>• English-speaking</li> </ul>                                                                                                                                                                                          |

Table 2. Minimum Patient Recruitment Numbers by Demographic

| <b>Demographic</b> |                                     | <b>Minimum Number of Patients</b> |
|--------------------|-------------------------------------|-----------------------------------|
| Age                | 0-4 years                           | 3                                 |
|                    | 5-8 years                           | 3                                 |
|                    | 9-12 years                          | 3                                 |
|                    | 13-16 years                         | 3                                 |
| Sex                | Male                                | 5                                 |
|                    | Female                              | 5                                 |
| Disease Presence   | Active otorrhoea                    | 4                                 |
|                    | Previous otorrhoea within last year | 4                                 |

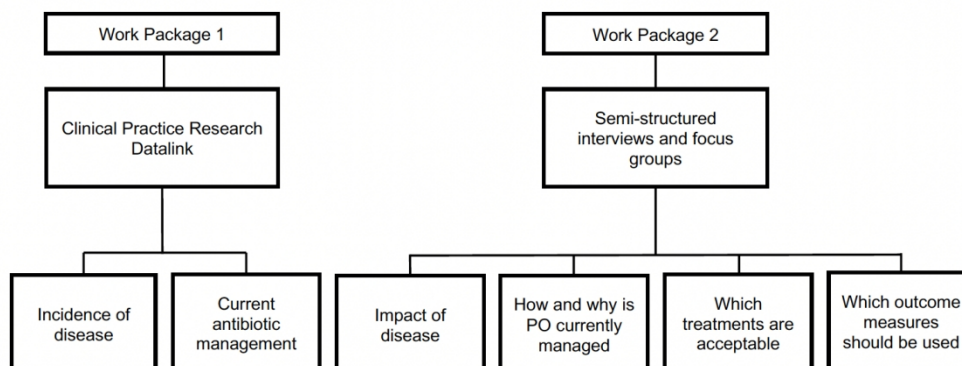

Figure 1. Study work packages and linked study objectives (PO = paediatric otorrhoea).

280x110mm (144 x 144 DPI)

| medcodeid   | readcode | snomedctconceptid | snomedctdescriptionid | Aurum Database                                                                | Coding Selection |
|-------------|----------|-------------------|-----------------------|-------------------------------------------------------------------------------|------------------|
| 8.45868E+15 |          | 1.08256E+15       | 3078540019            | Recurrent acute suppurative otitis media with spontaneous rupture of ear drum | Primary          |
| 253190015   | 1C4Z.00  | 162362000         | 253183013             | Ear discharge symptom NOS                                                     | Primary          |
| 253183013   | 1C4..00  | 162362000         | 253183013             | Ear discharge symptoms                                                        | Primary          |
| 4.5481E+15  |          | 162364004         | 253187014             | Discharge from ear                                                            | Primary          |
| 4.54811E+15 |          | 162364004         | 253188016             | Discharging ear                                                               | Primary          |
| 253186017   | 1C42.00  | 162364004         | 253186017             | Ear discharge present                                                         | Primary          |
| 255616012   | 2D6..00  | 164211000         | 255616012             | O/E - discharge from ear                                                      | Primary          |
| 255623013   | 2D6Z.00  | 164211000         | 255616012             | O/E - ear discharge NOS                                                       | Primary          |
| 4.57677E+15 |          | 164211000         | 2667264011            | On examination - discharge from ear                                           | Primary          |
| 255618013   | 2D62.00  | 164213002         | 255618013             | O/E - serous ear discharge                                                    | Primary          |
| 4.57681E+15 |          | 164213002         | 2667266013            | On examination - serous ear discharge                                         | Primary          |
| 255620011   | 2D64.00  | 164215009         | 255620011             | O/E - purulent ear discharge                                                  | Primary          |
| 4.57685E+15 |          | 164215009         | 2666962013            | On examination - purulent ear discharge                                       | Primary          |
| 5.8754E+15  |          | 300132001         | 1490583015            | Discharge from ear                                                            | Primary          |
| 5.87537E+15 |          | 300132001         | 1477433018            | Ear discharge                                                                 | Primary          |
| 5.87538E+15 |          | 300132001         | 441141019             | Finding of ear discharge                                                      | Primary          |
| 5.87539E+15 |          | 300132001         | 1226738019            | Observation of ear discharge                                                  | Primary          |
| 3.06032E+15 |          | 34790005          | 58064015              | Benign chronic suppurative otitis media with anterior perforation of ear drum | Primary          |
| 3.11845E+15 |          | 38394007          | 490747016             | CSOM - Chronic suppurative otitis media                                       | Primary          |
| 299067013   | F523.00  | 38394007          | 63479018              | Chronic suppurative otitis media                                              | Primary          |
| 299529015   | FyuP200  | 38394007          | 63478014              | [X]Other chronic suppurative otitis media                                     | Primary          |
| 6.22921E+14 | F586011  | 65668001          | 109100010             | Discharge of ear                                                              | Primary          |
| 3.56778E+15 |          | 65668001          | 109101014             | Drainage from external ear canal                                              | Primary          |
| 3.56776E+15 |          | 65668001          | 109096014             | Otorrhea                                                                      | Primary          |
| 109102019   | F586.00  | 65668001          | 109102019             | Otorrhoea                                                                     | Primary          |
| 8.83841E+14 | F586.99  | 65668001          | 8.83841E+14           | Otorrhoea - discharging ear                                                   | Primary          |

|    |             |         |             |             |                                                                     |           |
|----|-------------|---------|-------------|-------------|---------------------------------------------------------------------|-----------|
| 1  |             |         |             |             |                                                                     |           |
| 2  | 299229016   | F586z00 | 65668001    | 109102019   | Otorrhoea NOS                                                       | Primary   |
| 3  |             |         |             |             |                                                                     |           |
| 4  | 399506010   | F586000 | 65668001    | 109102019   | Unspecified otorrhoea                                               | Primary   |
| 5  | 1.27288E+16 |         | 6.94131E+14 | 1.51841E+15 | Chronic suppurative otitis media NOS                                | Primary   |
| 6  |             |         |             |             |                                                                     |           |
| 7  | 4.60551E+14 | F520100 | 86279000    | 1235118013  | Acute suppurative otitis media - tympanic membrane ruptured         | Primary   |
| 8  | 3.90297E+15 |         | 86279000    | 1235119017  | Acute suppurative otitis media with discharge                       | Primary   |
| 9  |             |         |             |             |                                                                     |           |
| 10 | 3.90295E+15 |         | 86279000    | 143085014   | Acute suppurative otitis media with spontaneous rupture of ear drum | Primary   |
| 11 | 5.56821E+14 | F521.00 | 87665008    | 1235262012  | Chronic suppurative otitis media - tubotympanic                     | Primary   |
| 12 |             |         |             |             |                                                                     |           |
| 13 | 3.92483E+15 |         | 87665008    | 145352014   | Chronic tubotympanic suppurative otitis media                       | Primary   |
| 14 | 4.06248E+15 |         | 95803004    | 158677012   | Serous drainage from external ear canal                             | Primary   |
| 15 |             |         |             |             |                                                                     |           |
| 16 | 4.06249E+15 |         | 95804005    | 158678019   | Purulent drainage from external ear canal                           | Primary   |
| 17 | 4.06251E+15 |         | 95805006    | 158679010   | Foul odor drainage from external ear canal                          | Primary   |
| 18 |             |         |             |             |                                                                     |           |
| 19 | 4.0625E+15  |         | 95805006    | 201783016   | Foul odour drainage from external ear canal                         | Primary   |
| 20 | 3.11848E+15 |         | 38394007    | 490751019   | Chronic otitis media with perforation                               | Secondary |
| 21 |             |         |             |             |                                                                     |           |
| 22 | 3.17615E+15 |         | 41954005    | 70007011    | Chronic atticoantral suppurative otitis media                       | Secondary |
| 23 | 5.56811E+14 | F522.00 | 41954005    | 1229812011  | Chronic suppurative otitis media - atticoantral                     | Secondary |
| 24 | 4.77469E+15 |         | 194281003   | 299062019   | ASOM - Acute suppurative otitis media                               | Secondary |
| 25 |             |         |             |             |                                                                     |           |
| 26 | 4.7747E+15  |         | 194281003   | 299064018   | Acute purulent otitis media                                         | Secondary |
| 27 |             |         |             |             |                                                                     |           |
| 28 | 299061014   | F520.00 | 194281003   | 299061014   | Acute suppurative otitis media                                      | Secondary |
| 29 | 299066016   | F520z00 | 194281003   | 299061014   | Acute suppurative otitis media NOS                                  | Secondary |
| 30 | 4.77471E+15 |         | 194282005   | 2575709017  | Acute suppurative otitis media due to another disease               | Secondary |
| 31 |             |         |             |             |                                                                     |           |
| 32 | 299065017   | F520300 | 194282005   | 299065017   | Acute suppurative otitis media due to disease EC                    | Secondary |
| 33 | 299069011   | F524000 | 194286008   | 299069011   | Bilateral suppurative otitis media                                  | Secondary |
| 34 |             |         |             |             |                                                                     |           |
| 35 | 3.06031E+15 |         | 34790005    | 58063014    | Chronic tubotympanic disease with anterior perforation of ear drum  | Secondary |
| 36 | 490746013   | F513100 | 38394007    | 490746013   | Chronic otitis media with effusion, purulent                        | Secondary |
| 37 |             |         |             |             |                                                                     |           |
| 38 | 8.83741E+14 | F523.99 | 6.94131E+14 | 8.83741E+14 | Chronic purulent otitis media                                       | Secondary |
| 39 | 490749018   | F513111 | 38394007    | 490749018   | Chronic secretory otitis media, purulent                            | Secondary |
| 40 |             |         |             |             |                                                                     |           |
| 41 | 3.11847E+15 |         | 38394007    | 490750018   | Otitis media with effusion - purulent                               | Secondary |
| 42 |             |         |             |             |                                                                     |           |
| 43 |             |         |             |             |                                                                     |           |
| 44 |             |         |             |             |                                                                     |           |
| 45 |             |         |             |             |                                                                     |           |
| 46 |             |         |             |             |                                                                     |           |



|    |             |         |             |             |                                                                                            |           |
|----|-------------|---------|-------------|-------------|--------------------------------------------------------------------------------------------|-----------|
| 1  |             |         |             |             |                                                                                            |           |
| 2  | 1.16801E+14 | F52..00 | 39288006    | 65880011    | Purulent otitis media                                                                      | Secondary |
| 3  |             |         |             |             |                                                                                            |           |
| 4  | 299068015   | F524.00 | 39288006    | 65880011    | Purulent otitis media NOS                                                                  | Secondary |
| 5  | 3.13204E+15 |         | 39288006    | 65883013    | Suppurative otitis media                                                                   | Secondary |
| 6  |             |         |             |             |                                                                                            |           |
| 7  | 3.17617E+15 |         | 41954005    | 70011017    | Persistent mucosal disease with posterior AND/OR superior marginal perforation of ear drum | Secondary |
| 8  | 8.83741E+14 | F523.99 | 6.94131E+14 | 8.83741E+14 | Chronic purulent otitis media                                                              | Secondary |
| 9  |             |         |             |             |                                                                                            |           |
| 10 | 7.98739E+15 |         | 7.361E+12   | 3022971014  | Perforation of tympanic membrane due to otitis media                                       | Secondary |
| 11 | 504727012   | F511.11 | 81564005    | 504727012   | Chronic secretory otitis media, serous                                                     | Secondary |
| 12 | 135302019   | F511.99 | 81564005    | 8.83691E+14 | Chronic serous otitis media                                                                | Secondary |
| 13 |             |         |             |             |                                                                                            |           |
| 14 | 299024017   | F511z00 | 81564005    | 135302019   | Chronic serous otitis media                                                                | Secondary |
| 15 |             |         |             |             |                                                                                            |           |
| 16 | 3.82626E+15 |         | 81564005    | 504725016   | Glue ear - serous                                                                          | Secondary |
| 17 | 5.55791E+14 | F511.00 | 81564005    | 504726015   | Otitis media with effusion - serous                                                        | Secondary |
| 18 |             |         |             |             |                                                                                            |           |
| 19 | 3.82625E+15 |         | 81564005    | 135305017   | Simple chronic serous otitis media                                                         | Secondary |
| 20 | 299023011   | F511300 | 81564005    | 135302019   | Unilateral chronic serous otitis                                                           | Secondary |
| 21 |             |         |             |             |                                                                                            |           |
| 22 | 5.0338E+15  |         | 232251007   | 347975014   | Recurrent acute suppurative otitis media                                                   | Secondary |
| 23 | 6.01386E+15 |         | 312218008   | 455892014   | Infective otitis media                                                                     | Secondary |
| 24 |             |         |             |             |                                                                                            |           |
| 25 | 11759018    | F512100 | 6485001     | 11759018    | Mucosanguinous chronic otitis media                                                        | Secondary |
| 26 | 7.57612E+15 |         | 703469002   | 3008656010  | Bacterial otitis media                                                                     | Secondary |
| 27 |             |         |             |             |                                                                                            |           |
| 28 | 7.82221E+15 |         | 721742004   | 3325908013  | Otitis media caused by Streptococcus pneumoniae                                            | Secondary |
| 29 | 7.82222E+15 |         | 721742004   | 3325909017  | Streptococcus pneumoniae otitis media                                                      | Secondary |
| 30 |             |         |             |             |                                                                                            |           |
| 31 |             |         |             |             |                                                                                            |           |
| 32 |             |         |             |             |                                                                                            |           |
| 33 |             |         |             |             |                                                                                            |           |
| 34 |             |         |             |             |                                                                                            |           |
| 35 |             |         |             |             |                                                                                            |           |
| 36 |             |         |             |             |                                                                                            |           |
| 37 |             |         |             |             |                                                                                            |           |
| 38 |             |         |             |             |                                                                                            |           |
| 39 |             |         |             |             |                                                                                            |           |
| 40 |             |         |             |             |                                                                                            |           |
| 41 |             |         |             |             |                                                                                            |           |
| 42 |             |         |             |             |                                                                                            |           |
| 43 |             |         |             |             |                                                                                            |           |
| 44 |             |         |             |             |                                                                                            |           |
| 45 |             |         |             |             |                                                                                            |           |
| 46 |             |         |             |             |                                                                                            |           |

# BMJ Open

## Protocol for the Paediatric Otorrhoea Study (POSt): a multi-methods study to understand the burden of paediatric otorrhoea in the UK

|                                 |                                                                                                                                                                                                                                                                                                                                                                                                                                                                                                                                                                                                                                                                                                                                                                                                                                                                                                                                                                                                                                                                                                                                                                                                                                                                                                                                                                                                                                                                                                                                                                                                                                   |
|---------------------------------|-----------------------------------------------------------------------------------------------------------------------------------------------------------------------------------------------------------------------------------------------------------------------------------------------------------------------------------------------------------------------------------------------------------------------------------------------------------------------------------------------------------------------------------------------------------------------------------------------------------------------------------------------------------------------------------------------------------------------------------------------------------------------------------------------------------------------------------------------------------------------------------------------------------------------------------------------------------------------------------------------------------------------------------------------------------------------------------------------------------------------------------------------------------------------------------------------------------------------------------------------------------------------------------------------------------------------------------------------------------------------------------------------------------------------------------------------------------------------------------------------------------------------------------------------------------------------------------------------------------------------------------|
| Journal:                        | <i>BMJ Open</i>                                                                                                                                                                                                                                                                                                                                                                                                                                                                                                                                                                                                                                                                                                                                                                                                                                                                                                                                                                                                                                                                                                                                                                                                                                                                                                                                                                                                                                                                                                                                                                                                                   |
| Manuscript ID                   | bmjopen-2023-078052.R1                                                                                                                                                                                                                                                                                                                                                                                                                                                                                                                                                                                                                                                                                                                                                                                                                                                                                                                                                                                                                                                                                                                                                                                                                                                                                                                                                                                                                                                                                                                                                                                                            |
| Article Type:                   | Protocol                                                                                                                                                                                                                                                                                                                                                                                                                                                                                                                                                                                                                                                                                                                                                                                                                                                                                                                                                                                                                                                                                                                                                                                                                                                                                                                                                                                                                                                                                                                                                                                                                          |
| Date Submitted by the Author:   | 27-Jul-2023                                                                                                                                                                                                                                                                                                                                                                                                                                                                                                                                                                                                                                                                                                                                                                                                                                                                                                                                                                                                                                                                                                                                                                                                                                                                                                                                                                                                                                                                                                                                                                                                                       |
| Complete List of Authors:       | <p>Heward, Elliot; The University of Manchester, Division of Infection, Immunity and Respiratory Medicine, School of Biological Sciences, Faculty of Biology, Medicine and Health</p> <p>Dempsey, James; Royal Manchester Children's Hospital</p> <p>Lunn, Judith; Lancaster University</p> <p>Molloy, John; Royal Manchester Children's Hospital; The University of Manchester, Division of Infection, Immunity and Respiratory Medicine, School of Biological Sciences, Faculty of Biology, Medicine and Health</p> <p>Isba, Rachel; Lancaster University; Alder Hey Children's NHS Foundation Trust</p> <p>Carr, Matthew; The University of Manchester, Division of Pharmacy &amp; Optometry, School of Health Sciences, Faculty of Biology, Medicine and Health</p> <p>Ashcroft, Darren; The University of Manchester, Division of Pharmacy &amp; Optometry, School of Health Sciences, Faculty of Biology, Medicine and Health; The University of Manchester, NIHR Greater Manchester Patient Safety Research Collaboration (PSRC)</p> <p>Hay, Alastair; University of Bristol, Centre for Academic Primary Care, Bristol Medical School: Population Health Sciences</p> <p>Nichani, Jaya; Royal Manchester Children's Hospital; The University of Manchester, Division of Infection, Immunity and Respiratory Medicine, School of Biological Sciences, Faculty of Biology, Medicine and Health</p> <p>Bruce, Iain; Royal Manchester Children's Hospital; The University of Manchester, Division of Infection, Immunity and Respiratory Medicine, School of Biological Sciences, Faculty of Biology, Medicine and Health</p> |
| <b>Primary Subject Heading</b>: | Ear, nose and throat/otolaryngology                                                                                                                                                                                                                                                                                                                                                                                                                                                                                                                                                                                                                                                                                                                                                                                                                                                                                                                                                                                                                                                                                                                                                                                                                                                                                                                                                                                                                                                                                                                                                                                               |
| Secondary Subject Heading:      | Ear, nose and throat/otolaryngology, Epidemiology, Qualitative research                                                                                                                                                                                                                                                                                                                                                                                                                                                                                                                                                                                                                                                                                                                                                                                                                                                                                                                                                                                                                                                                                                                                                                                                                                                                                                                                                                                                                                                                                                                                                           |
| Keywords:                       | Paediatric otolaryngology < OTOLARYNGOLOGY, EPIDEMIOLOGIC STUDIES, QUALITATIVE RESEARCH                                                                                                                                                                                                                                                                                                                                                                                                                                                                                                                                                                                                                                                                                                                                                                                                                                                                                                                                                                                                                                                                                                                                                                                                                                                                                                                                                                                                                                                                                                                                           |
|                                 |                                                                                                                                                                                                                                                                                                                                                                                                                                                                                                                                                                                                                                                                                                                                                                                                                                                                                                                                                                                                                                                                                                                                                                                                                                                                                                                                                                                                                                                                                                                                                                                                                                   |

1  
2  
3  
4  
5  
6  
7  
8  
9  
10  
11  
12  
13  
14  
15  
16  
17  
18  
19  
20  
21  
22  
23  
24  
25  
26  
27  
28  
29  
30  
31  
32  
33  
34  
35  
36  
37  
38  
39  
40  
41  
42  
43  
44  
45  
46  
47  
48  
49  
50  
51  
52  
53  
54  
55  
56  
57  
58  
59  
60

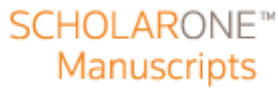

1  
2  
3 Protocol for the Paediatric Otorrhoea Study (POSt): a multi-methods study to  
4 understand the burden of paediatric otorrhoea in the UK  
5

6  
7 Elliot Heward<sup>1</sup>, James Dempsey<sup>2</sup>, Judith Lunn<sup>3</sup>, John Molloy<sup>1,2</sup>, Rachel Isba<sup>3,4</sup>,  
8 Matthew Carr<sup>5</sup>, Darren M Ashcroft<sup>5,6</sup>, Alastair D Hay<sup>7</sup>, Jaya R Nichani<sup>1,2</sup>, Iain A  
9 Bruce<sup>1,2</sup>  
10

11  
12 <sup>1</sup>Division of Infection, Immunity and Respiratory Medicine, School of Biological  
13 Sciences, Faculty of Biology, Medicine and Health, University of Manchester, UK

14 <sup>2</sup>Royal Manchester Children's Hospital, Manchester University Hospitals NHS  
15 Foundation Trust, UK

16 <sup>3</sup>Lancaster Medical School, Lancaster University, Health Innovation One, Sir John  
17 Fisher Drive, Lancaster, UK

18 <sup>4</sup>Alder Hey Children's Hospital, Alder Hey Children's NHS Foundation Trust, UK

19 <sup>5</sup>Division of Pharmacy & Optometry, School of Health Sciences, Faculty of Biology,  
20 Medicine and Health, University of Manchester, UK

21 <sup>6</sup>NIHR Greater Manchester Patient Safety Research Collaboration (PSRC),  
22 University of Manchester, UK

23 <sup>7</sup>Centre for Academic Primary Care, Bristol Medical School: Population Health  
24 Sciences, University of Bristol, Bristol, UK  
25

26  
27 Corresponding Author: Mr Elliot Heward  
28

29  
30 Email Address: [elliotheward@doctors.org.uk](mailto:elliotheward@doctors.org.uk)  
31

32  
33 Address: Paediatric Otolaryngology Research Office, Royal Manchester Children's  
34 Hospital, Manchester University Hospitals NHS Foundation Trust, UK  
35

36  
37 Telephone: 01612765606  
38

39  
40  
41  
42 Keywords: paediatric otolaryngology, epidemiologic studies, qualitative research  
43

44  
45  
46 Word Count: 2652  
47  
48  
49  
50  
51  
52  
53  
54  
55  
56  
57  
58  
59  
60

## Abstract

### Introduction

Paediatric otorrhoea (PO) refers to the leakage of fluid through a perforation in the ear drum, resulting from an infection of the middle ear of a child or young person (CYP). PO frequently results in hearing loss which may lead to developmental delay, restricted communication and reduced educational attainment.

Epidemiological information for PO is largely derived from low-income countries. The aim of this study will be to establish the incidence of PO within the UK and to understand the impact of PO on CYP and their families' everyday lives. It will build the foundations for a randomised controlled trial investigating the best antibiotic treatment for PO.

### Methods and Analysis

The study will consist of two work packages. 1) Data from the Clinical Practice Research Datalink (CPRD), January 2005 to July 2021, will be used to determine the incidence of patient presentations with PO to primary care in the UK. It will also explore the current antimicrobial prescribing practice for PO in primary care. 2) Thirty semi-structured interviews will be conducted from 13<sup>th</sup> July to 31<sup>st</sup> October 2023 with CYP and their parents/carers to help identify the impact of PO on everyday life, the patient journey and how service users define treatment success. Three medical professional focus groups will be used to understand the current management practice, how treatment success is measured and acceptability to randomise patients. Thematic analysis will be used.

### Ethics and dissemination

The Health Research Authority, The Health and Social Care Research Ethics Committee (23/NI/0082) and the CPRD's research data governance panel (22\_002508) reviewed this study. Results will be disseminated at medical conferences, in peer-reviewed journals and via social media. The study will co-create a webpage on [healthtalk.org](http://healthtalk.org), with the Dipex Charity, about PO so to ensure members of the public can learn more about the condition.

## Strengths and Limitations of the Study

- Patient and public involvement has been used to shape the study aims and design.
- The CPRD provides access to anonymised population-based electronic health records from general practices in the UK which will help determine the incidence and antibiotic treatment for paediatric otorrhoea.
- The limitation of CPRD database is that missing data is inevitable due to coding variation and incidence rates will be based solely on primary care presentations.
- Involvement of patients, their parents/carers and medical professionals will provide a range of experiences.
- The qualitative results will identify the most common themes and will not encompass all possible patient or medical professional experiences.

## Introduction

Paediatric otorrhoea (PO) is discharge from a child's ear, that usually results from an infection of the middle ear. The accumulation of pus in the middle ear space causes the tympanic membrane to stretch until it ruptures, with the resultant leakage of foul-smelling discharge from the ear; called Acute Otitis Media with discharge (AOMd). If AOMd persists it can lead to a permanent perforation of the ear drum with chronic discharge. The World Health Organization (WHO) classifies otorrhoea lasting more than two weeks as Chronic Suppurative Otitis Media (CSOM), although various alternative time frames are used in the medical literature <sup>1</sup>.

In routine clinical practice, classification systems for ear infections based on chronicity are not widely adopted by clinicians as they are not considered helpful in guiding management decisions. The presence, or absence, of otorrhoea being considered of greater relevance to treatment decisions. Our study group prefers to use the term Paediatric Otorrhoea (PO) to encompass the single disease process (AOMd and CSOM) as it translates more readily into clinical practice.

It is estimated that PO affects 50 million CYP per year globally <sup>2-4</sup>. PO may cause significant temporary or permanent morbidity in children, most frequently resulting in hearing loss, which may then lead to developmental delay, restricted communication, poor psychosocial development, and reduced educational attainment<sup>1</sup>. The WHO estimates that chronically discharging ears account for over half of hearing disability globally<sup>1</sup>. In addition, significant complications can occur, resulting in temporary or permanent sequelae such as imbalance, facial weakness and brain infections.

1  
2  
3 The psychosocial impact of PO on children and young people (CYP) and their care  
4 givers is poorly understood. Caregiver concern has been shown to be more  
5 prominent than the physical symptoms of PO in the limited published literature <sup>5</sup>.  
6 Public involvement (CYP and their carers) during development of this study was  
7 supported by a National Institute for Health and Care Research (NIHR) Research  
8 Design Service (RDS) public involvement grant (RDSNW3687). Experts-by-  
9 experience described years of recurrent 'smelly' discharge negatively impacting on  
10 education, sporting activities and socialisation. CYP that were affected, as well as  
11 carers, explained that educators and family members seemed to not understand the  
12 condition. Caregivers felt that more effective treatment and quicker referral to  
13 secondary care was required.  
14  
15  
16  
17  
18

19 The aim of this study is to develop high-quality data to form the foundations for a  
20 randomised controlled trial (RCT) investigating the management options for PO. This  
21 will be achieved through the following objectives:  
22  
23

- 24 • determine the incidence and treatment for PO in the UK;
- 25 • improve the understanding of the impact of PO on CYP and carers to ensure  
26 clinically meaningful outcome measures are selected;
- 27 • understand how and why CYP with PO are currently treated and to assess  
28 treatment and randomisation acceptability for CYP, their carers and  
29 healthcare professionals for a future RCT.  
30  
31  
32  
33  
34  
35

## 36 **Methods and Analysis**

### 37 **Study Design**

38  
39 This study will be divided into two work packages to answer the research objectives  
40 (Figure 1).  
41  
42  
43  
44

### 45 **Patient and Public Involvement**

46  
47 This study has co-design and co-production running as a theme throughout. A (RDS)  
48 public involvement grant allowed the involvement of CYP with PO and their  
49 parents/carers during the study design stage. Their suggestions and experiences  
50 helped to shape every aspect of the study design. For example, parents/carers  
51 suggested either virtual meetings or phone calls were preferable to a face-to-face  
52 meeting due to their flexibility around childcare. This feedback is reflected in the  
53 study design.  
54  
55  
56  
57

58 A Patient Advisory Group (PAG) will be formed for the study, which will consist of 4-6  
59 young people/parents/guardians who will meet at 3-to-4-monthly intervals. The goals  
60

of the PAG are to help maintain the patient-focused nature of the work, maintain transparency, guide the design of the interview template and written patient information materials, as well as direct dissemination of the results.

To help determine the most effective methods of research dissemination and to help gain feedback on the design of a subsequent RCT, a study design workshop with public representatives will be conducted in January 2024. During the current study, we will identify and invite experts-by-experience to join the investigative team for the development of the subsequent research.

All members of the public will be supported by the PPI lead before, during and following the study. Training and support will be provided to all service users involved in this research.

## Work Package 1

### Design

Anonymised patient electronic health record data will be sourced from the CPRD. The CPRD contains electronic healthcare records from 1,760 (21% of all) general practices, including over 16 million patients, in the UK<sup>6,7</sup>. Of these patients, approximately 20% are aged under 18 years old<sup>8</sup>. Data will be utilised from the Aurum dataset.

During the study period of interest, 1<sup>st</sup> January 2005 to 31<sup>st</sup> July 2021, CYP aged 16 years and below will be included. Patients will be followed up until: index PO episode, death, date of transfer out of practice, last date of data collection, study end date or their 16th birthday, whichever comes earliest.

We will calculate annual incidence rates for PO categorised by: biological sex assigned at birth, age, geographical location and Index of Multiple Deprivation (IMD). We will generate these estimates by counting the number of cases and divide them by the total person-years at risk. The incidence will be presented as per 1000 person-years with its 95% confidence interval. Antibiotic prescription data (by route and type) will also be examined.

### Outcomes

Primary outcome measure: diagnosis with paediatric otorrhoea

Secondary outcomes measures:

- type and frequency of antibiotic prescriptions for PO;
- frequency of referrals to secondary care ear, nose and throat services.



#### Factors measured:

- biological Sex at Birth
- age
- geographical location
- index of Multiple Deprivation

#### Sample Size

The proposed study is descriptive in design, therefore we do not have specific hypotheses and a formal sample size calculation is not required.

#### Limitations

The major limitations of the database are missing data and coding variation. Incomplete diagnoses, or those coded using free text, will not be identified by the CPRD. To ensure the correct patient presentations were identified an exhaustive list of codes related to PO was generated for the Aurum database (supplementary file). Four clinicians reviewed the coding list. Codes were categorised as primary codes (correctly identify patients with otorrhoea), secondary codes (may identify patients with otorrhoea) or irrelevant coding. The secondary list will be used for a sensitivity analysis. Where clinicians disagreed in the coding decision, a consensus was reached following discussion. Codes were classified as secondary codes if there was no majority consensus to whether the code described PO. Codes relating to grommets or tympanostomy tubes were excluded as infection of grommets can also cause otorrhoea. Missing outcome data are not likely to be a major issue since diagnostic codes are binary and therefore indicate the presence or absence of clinical condition.

#### Analysis

Crude overall incidence rates (with 95% confidence intervals) will be estimated. We will also produce internally age- and sex-standardised incidence rates over the duration of the study period. The data will then be structured in an annual time-series format with event counts and 'person-years at risk' aggregated (by year) with stratification by sex, age group and deprivation (IMD) quintile. Mean-dispersion negative binomial regression models will be used to describe the trends in incidence rates over time. The natural logarithm of the denominator (person-years at risk) will be used as an offset in each regression model. To account for potential non-linear trends, calendar time will be modelled using splines or fractional polynomials. Practice-level variation will be examined using multi-level variants of the regression models with practice modelled using random effects. Sensitivity analyses will be

1  
2  
3 undertaken to compare the incidence rates using the primary and secondary coding  
4 lists only.  
5  
6

## 7 Work Package 2

### 8 9 10 Study Design

11  
12 Semi-structured interviews will be conducted with CYP and their parents/carers, and  
13 focus groups with medical professionals. A semi-structured interview approach has  
14 been chosen due to its interactive and flexible nature, which is useful to capture the  
15 reality of everyday experience. The interview guide for the interviews and focus  
16 groups are expected to evolve following participant responses (supplementary file).  
17 Inclusion criteria is outlined in Table 1.  
18  
19  
20

### 21 Sample Size

22  
23 The recruitment aim for the patient interviews is 30 interviews or when data  
24 saturation is reached and the minimum number of patients with key demographics  
25 have participated (Table 2). The recruitment aim for the medical professional focus  
26 groups is 24 participants divided over three focus groups. The sample size is  
27 estimated to allow for sufficient representation of the population of patients with PO.  
28 The study aims to capture a wide variety of experiences and practices within the  
29 medical professional cohort. Prior research studies addressing similar clinical  
30 questions and population were considered to reach the proposed sample size<sup>9</sup>. It  
31 also takes into account the cost and time required to undertake 30 patient interviews  
32 and three focus groups.  
33  
34  
35  
36  
37  
38

### 39 Recruitment

#### 40 41 42 Patient Interviews

43  
44 Patient recruitment will use a direct-to-patient method by advertising the study using  
45 posters in medical establishments (e.g. GP practices and hospital outpatient waiting  
46 rooms), online (e.g. charities, societies and institutions) and on social media.  
47  
48  
49

50 The poster advertisement will direct the patient or carer to contact the research team  
51 by text, call or email. Recruitment will take place via a single institution. After the  
52 patient contacts the research team and expresses an interest in participating the  
53 cover letter, parent or carer information sheet and age-appropriate patient  
54 information sheet (PIS) will be sent to the participant.  
55  
56  
57  
58  
59  
60

1  
2  
3 The patient and parent/carer will be given the opportunity to read the study material  
4 to determine if they would like to participate. There will be a minimum of two days  
5 between sending the information material to the patient and arranging an interview.  
6  
7

8 In acknowledgement of participants' valuable time, they will be remunerated with a  
9 gift £25 voucher in line with the NIHR guidelines for public involvement remuneration  
10 <sup>10</sup>. Participants will be offered to be informed of the research findings.  
11  
12

### 13 14 Medical Professional Focus Groups 15

16 Recruitment will use a direct-to-participant advertisement. A poster advertising the  
17 study will be sent for distribution through professional bodies, medical institutions  
18 and to primary and secondary care settings. The study poster will direct medical  
19 professionals to contact the research team to take part. Once they contact the  
20 research team, they will be sent the medical professional cover letter and PIS and  
21 booked onto a focus group session.  
22  
23

24  
25 All participants will be offered to be informed of the research findings and will be  
26 acknowledged individually in publications produced from this work.  
27  
28

### 29 30 Consent 31

32  
33 Informed consent will be obtained prior to the participants undergoing any study  
34 related activities. The qualitative researcher will lead the consent discussion with all  
35 participants and will have up-to-date GCP training.  
36  
37

38 To improve dissemination of the research findings, the study team is working with the  
39 Dipex charity to create a webpage on <https://healthtalk.org> where information about  
40 PO can be shared publicly. The qualitative researcher will invite patients (CYP and  
41 their parents/carers) to be involved by contributing short clips of their video recording,  
42 audio recording or a transcript of their interview to the web page. Participating in this  
43 aspect of the study is optional and does not preclude the patients from taking part in  
44 the study.  
45  
46  
47

### 48 49 Data Collection 50

#### 51 52 Patient interviews 53

54  
55 Interviews are expected to last between 45-60 minutes, but the length of the  
56 interview will be guided by the participant. The patient's age at the time of interview  
57 and sex will be collected from the patient or parent/carer.  
58  
59  
60

1  
2  
3 Parents/carers will be invited to take part in the interview on behalf of children  
4 younger than 5 years old. CYP who are 5 years or older will be invited to participate  
5 in joint interviews with their parents/carers, to recognise the importance of their  
6 experiences.  
7  
8  
9

10 The study aims to reduce barriers to participation by using interpreters in the study.  
11 Sign language interpreters will be available for virtual or face-to-face interviews if  
12 required. An interpreter will be used for non-English-speaking participants. The  
13 interpreter will be used for patient consent and interview. Written material will be  
14 translated into any language for up to 6 participants if required. This number is based  
15 on the proportion of non-English speaking people in England and Wales. Translation  
16 will be performed depending on patient preference. Where possible, to improve the  
17 interview dynamic, the interpreter and the interviewer will be in the same location if a  
18 virtual interview is taking place. Interviews involving an interpreter will be allocated  
19 additional time to allow for translation time.  
20  
21  
22  
23  
24

#### 25 Medical Professional Focus Groups

26  
27  
28 Semi-structured focus groups will be conducted with groups consisting of 6-8  
29 participants. Nurses, audiologists, allied medical professionals, GPs, Emergency  
30 Department and Otolaryngology doctors will be invited to participate. Healthcare  
31 professionals from varied demographic locations and of different grades will be  
32 invited to take part in the study. Focus groups will last for up to 60 minutes.  
33  
34  
35

#### 36 Data Analysis

37  
38 Audio recording will be transcribed verbatim. The anonymised transcriptions will be  
39 imported to qualitative data analysis software for data management. Thematic  
40 analysis will follow guidance provided by Braun and Clarke (2006) who suggest the  
41 five key stages of thematic analysis include: (1) familiarizing with the data (2)  
42 generating codes (3) identifying themes (4) reviewing themes and collating into a  
43 thematic map or matrix (5) write up the findings<sup>11</sup>. We will also refer to Braun and  
44 Clarke's (2021) recent assessment guidelines for evaluating thematic analysis  
45 research quality to ensure a well-developed and justified analysis, and to avoid the  
46 most common problems with this approach ('proceduralism' or a non-reflexive  
47 grouping of themes)<sup>12</sup>. There will be multiple independent coders drawn from the  
48 research team, as well as inter-rater reliability measures applied to the iterative  
49 process from codes to themes<sup>11,13</sup>. The researchers will read and re-read the  
50 transcript to familiarise themselves with the data. Codes will then be generated in a  
51 systematic manner across the data set. Subsequently, the codes will be collated into  
52 potential themes which will then be reviewed and refined. Two researchers will  
53 independently identify themes before discussion in order to reach consensus.  
54  
55  
56  
57  
58  
59  
60

## Ethics and Dissemination

The Clinical Practice Research Datalink (CRPD) protocol was approved by the CPRD's research data governance process (22\_002508) on 4 April 2023. The qualitative study was approved by The Health Research Authority on 23 June 2023 and The Research Ethics Committee (REC 23/NI/0082) on 15 June 2023.

This study will work with PAG members, service users involved in the study workshop and the Dipex charity to formulate an engagement plan to ensure the research findings are heard by the relevant audience. We will develop online public resources on [healthtalk.org](http://healthtalk.org) with the Dipex charity about PO. We aim to empower PAG members to help disseminate the research outcomes via local networks and online forums. Results will be disseminated to medical professionals at conferences, in peer-reviewed journals and via social media.

## Authors Contributions

Study conception and overall study design (EH & IB). Design of the public engagement elements (JD & JN). Design of work package 1 (MC, DA & AH). Design of work package 2 (JL, RI & JM). EH and JD drafted the manuscript which was reviewed by all authors.

## Funding statement

This work was supported by the National Institute of Health and Care Research (NIHR) grant number NIHR204036. DMA is supported by the NIHR Greater Manchester Patient Safety Research Collaboration (PSRC).

## Competing Interests

No competing interests declared.

## References

1. World Health Organization. Chronic suppurative otitis media. Burden of illness and management options. Available: <https://apps.who.int/iris/handle/10665/42941> [Accessed 22 July 2023]
2. Little P, Gould C, Williamson I, *et al*. Pragmatic randomised controlled trial of two prescribing strategies for childhood acute otitis media. *BMJ* 2001;10:336-42. doi: 10.1136/bmj.322.7282.336

- 1  
2  
3 3. Monasta L, Ronfani L, Marchetti F, *et al*. Burden of disease caused by otitis  
4 media: systematic review and global estimates. PLoS One. 2012;7:e36226.  
5 doi: 10.1371/journal.pone.0036226  
6
- 7  
8 4. Amnesty International. Children's Human Rights. Available:  
9 <https://www.amnesty.org/en/what-we-do/child-rights/> [Accessed 22 July 2023]  
10
- 11 5. Vlastos IM, Kandiloros D, Manolopoulos L, *et al*. Quality of life in children with  
12 chronic suppurative otitis media with or without cholesteatoma. Int J Pediatr  
13 Otorhinolaryngol. 2009;73:363-9. doi: 10.1016/j.ijporl.2008.10.030  
14
- 15 6. Clinical Practice Research Datalink. (2022). CPRD Aurum March  
16 2022 (Version 2022.03.001) [Data set]. Clinical Practice Research Datalink.  
17 <https://doi.org/10.48329/MY9S-4X08>  
18
- 19 7. Clinical Practice Research Datalink. (2022). CPRD GOLD March  
20 2022 (Version 2022.03.001) [Data set]. Clinical Practice Research Datalink.  
21 <https://doi.org/10.48329/5RHX-ER29>  
22
- 23 8. Wolf A, Dedman D, Campbell J, *et al*. Data resource profile: Clinical Practice  
24 Research Datalink (CPRD) Aurum. Int J Epidemiol. 2019;48:1740-1740g. doi:  
25 10.1093/ije/dyz034  
26
- 27 9. Vasileiou K, Barnett J, Thorpe S, *et al*. Characterising and justifying sample  
28 size sufficiency in interview-based studies: systematic analysis of qualitative  
29 health research over a 15-year period. BMC Med Res Methodol. 2018;18:148.  
30 doi: 10.1186/s12874-018-0594-7  
31
- 32 10. NIHR. Payment guidance for researchers and professionals. Available:  
33 [https://www.nihr.ac.uk/documents/payment-guidance-for-researchers-and-](https://www.nihr.ac.uk/documents/payment-guidance-for-researchers-and-professionals/27392)  
34 [professionals/27392](https://www.nihr.ac.uk/documents/payment-guidance-for-researchers-and-professionals/27392) [Accessed 22 July 2023]  
35
- 36 11. Braun V, Clarke V. Using thematic analysis in psychology. Qualitative  
37 research in psychology. 2006;3:77-101. Doi: 10.1191/1478088706qp063oa  
38
- 39 12. Braun V, Clarke V. Thematic Analysis: A Practical Guide. Sage publications,  
40 2021  
41
- 42 13. Braun V, Clarke V. One size fits all? What counts as quality practice in  
43 (reflexive) thematic analysis?. Qualitative research in psychology.  
44 2021;18:328-52. Doi: 10.1080/14780887.2020.1769238  
45  
46  
47  
48  
49  
50  
51  
52  
53  
54  
55  
56  
57  
58  
59  
60

## Tables

Table 1. Inclusion and Exclusion Criteria

| Inclusion Criteria                |                                                                                                                                                                                                                                                                                                                                                                                                                      |
|-----------------------------------|----------------------------------------------------------------------------------------------------------------------------------------------------------------------------------------------------------------------------------------------------------------------------------------------------------------------------------------------------------------------------------------------------------------------|
| Patient Interviews                | <ul style="list-style-type: none"> <li>• Children and young people aged 16 years and under</li> <li>• Children and young people who have had otorrhoea in the past year</li> <li>• Caregiver legally able to give consent for the CYP or the CYP themselves has the capacity to consent</li> <li>• Live in the United Kingdom (UK)</li> <li>• All languages (up to six non-English-speaking participants)</li> </ul> |
| Medical Professional Focus Groups | <ul style="list-style-type: none"> <li>• Medical professionals with experience of caring for CYP with otorrhoea in their clinical practice</li> <li>• Currently practicing in the UK</li> <li>• English-speaking</li> </ul>                                                                                                                                                                                          |

Table 2. Minimum Patient Recruitment Numbers by Demographic

| Demographic      |                                     | Minimum Number of Patients |
|------------------|-------------------------------------|----------------------------|
| Age              | 0-4 years                           | 3                          |
|                  | 5-8 years                           | 3                          |
|                  | 9-12 years                          | 3                          |
|                  | 13-16 years                         | 3                          |
| Sex              | Male                                | 5                          |
|                  | Female                              | 5                          |
| Disease Presence | Active otorrhoea                    | 4                          |
|                  | Previous otorrhoea within last year | 4                          |

## Figure Legends

Figure 1. Study work packages and linked study objectives (PO = paediatric otorrhoea)

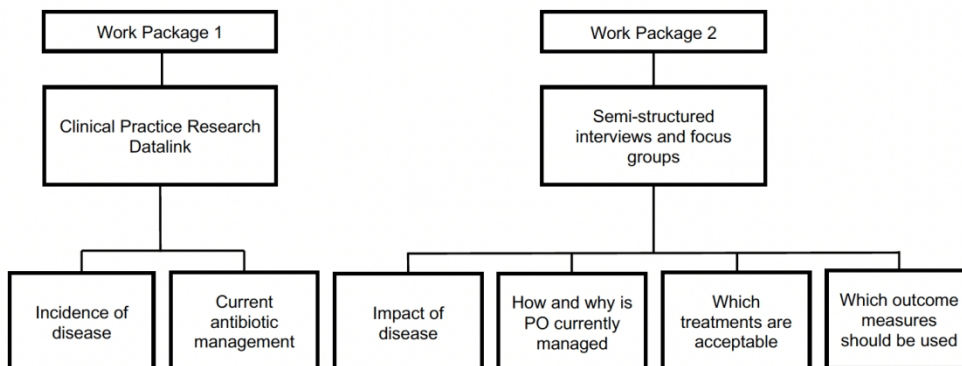

Figure 1. Study work packages and linked study objectives (PO = paediatric otorrhoea).

280x110mm (144 x 144 DPI)



| medcodeid   | readcode | snomedctconceptid | snomedctdescriptionid | Aurum Database                                                                | Coding Selection |
|-------------|----------|-------------------|-----------------------|-------------------------------------------------------------------------------|------------------|
| 8.45868E+15 |          | 1.08256E+15       | 3078540019            | Recurrent acute suppurative otitis media with spontaneous rupture of ear drum | Primary          |
| 253190015   | 1C4Z.00  | 162362000         | 253183013             | Ear discharge symptom NOS                                                     | Primary          |
| 253183013   | 1C4..00  | 162362000         | 253183013             | Ear discharge symptoms                                                        | Primary          |
| 4.5481E+15  |          | 162364004         | 253187014             | Discharge from ear                                                            | Primary          |
| 4.54811E+15 |          | 162364004         | 253188016             | Discharging ear                                                               | Primary          |
| 253186017   | 1C42.00  | 162364004         | 253186017             | Ear discharge present                                                         | Primary          |
| 255616012   | 2D6..00  | 164211000         | 255616012             | O/E - discharge from ear                                                      | Primary          |
| 255623013   | 2D6Z.00  | 164211000         | 255616012             | O/E - ear discharge NOS                                                       | Primary          |
| 4.57677E+15 |          | 164211000         | 2667264011            | On examination - discharge from ear                                           | Primary          |
| 255618013   | 2D62.00  | 164213002         | 255618013             | O/E - serous ear discharge                                                    | Primary          |
| 4.57681E+15 |          | 164213002         | 2667266013            | On examination - serous ear discharge                                         | Primary          |
| 255620011   | 2D64.00  | 164215009         | 255620011             | O/E - purulent ear discharge                                                  | Primary          |
| 4.57685E+15 |          | 164215009         | 2666962013            | On examination - purulent ear discharge                                       | Primary          |
| 5.8754E+15  |          | 300132001         | 1490583015            | Discharge from ear                                                            | Primary          |
| 5.87537E+15 |          | 300132001         | 1477433018            | Ear discharge                                                                 | Primary          |
| 5.87538E+15 |          | 300132001         | 441141019             | Finding of ear discharge                                                      | Primary          |
| 5.87539E+15 |          | 300132001         | 1226738019            | Observation of ear discharge                                                  | Primary          |
| 3.06032E+15 |          | 34790005          | 58064015              | Benign chronic suppurative otitis media with anterior perforation of ear drum | Primary          |
| 3.11845E+15 |          | 38394007          | 490747016             | CSOM - Chronic suppurative otitis media                                       | Primary          |
| 299067013   | F523.00  | 38394007          | 63479018              | Chronic suppurative otitis media                                              | Primary          |
| 299529015   | FyuP200  | 38394007          | 63478014              | [X]Other chronic suppurative otitis media                                     | Primary          |
| 6.22921E+14 | F586011  | 65668001          | 109100010             | Discharge of ear                                                              | Primary          |
| 3.56778E+15 |          | 65668001          | 109101014             | Drainage from external ear canal                                              | Primary          |
| 3.56776E+15 |          | 65668001          | 109096014             | Otorrhea                                                                      | Primary          |
| 109102019   | F586.00  | 65668001          | 109102019             | Otorrhoea                                                                     | Primary          |
| 8.83841E+14 | F586.99  | 65668001          | 8.83841E+14           | Otorrhoea - discharging ear                                                   | Primary          |

|    |             |         |             |             |                                                                     |           |
|----|-------------|---------|-------------|-------------|---------------------------------------------------------------------|-----------|
| 1  |             |         |             |             |                                                                     |           |
| 2  | 299229016   | F586z00 | 65668001    | 109102019   | Otorrhoea NOS                                                       | Primary   |
| 3  |             |         |             |             |                                                                     |           |
| 4  | 399506010   | F586000 | 65668001    | 109102019   | Unspecified otorrhoea                                               | Primary   |
| 5  | 1.27288E+16 |         | 6.94131E+14 | 1.51841E+15 | Chronic suppurative otitis media NOS                                | Primary   |
| 6  |             |         |             |             |                                                                     |           |
| 7  | 4.60551E+14 | F520100 | 86279000    | 1235118013  | Acute suppurative otitis media - tympanic membrane ruptured         | Primary   |
| 8  | 3.90297E+15 |         | 86279000    | 1235119017  | Acute suppurative otitis media with discharge                       | Primary   |
| 9  |             |         |             |             |                                                                     |           |
| 10 | 3.90295E+15 |         | 86279000    | 143085014   | Acute suppurative otitis media with spontaneous rupture of ear drum | Primary   |
| 11 | 5.56821E+14 | F521.00 | 87665008    | 1235262012  | Chronic suppurative otitis media - tubotympanic                     | Primary   |
| 12 |             |         |             |             |                                                                     |           |
| 13 | 3.92483E+15 |         | 87665008    | 145352014   | Chronic tubotympanic suppurative otitis media                       | Primary   |
| 14 | 4.06248E+15 |         | 95803004    | 158677012   | Serous drainage from external ear canal                             | Primary   |
| 15 |             |         |             |             |                                                                     |           |
| 16 | 4.06249E+15 |         | 95804005    | 158678019   | Purulent drainage from external ear canal                           | Primary   |
| 17 | 4.06251E+15 |         | 95805006    | 158679010   | Foul odor drainage from external ear canal                          | Primary   |
| 18 |             |         |             |             |                                                                     |           |
| 19 | 4.0625E+15  |         | 95805006    | 201783016   | Foul odour drainage from external ear canal                         | Primary   |
| 20 | 3.11848E+15 |         | 38394007    | 490751019   | Chronic otitis media with perforation                               | Secondary |
| 21 |             |         |             |             |                                                                     |           |
| 22 | 3.17615E+15 |         | 41954005    | 70007011    | Chronic atticoantral suppurative otitis media                       | Secondary |
| 23 | 5.56811E+14 | F522.00 | 41954005    | 1229812011  | Chronic suppurative otitis media - atticoantral                     | Secondary |
| 24 | 4.77469E+15 |         | 194281003   | 299062019   | ASOM - Acute suppurative otitis media                               | Secondary |
| 25 |             |         |             |             |                                                                     |           |
| 26 | 4.7747E+15  |         | 194281003   | 299064018   | Acute purulent otitis media                                         | Secondary |
| 27 |             |         |             |             |                                                                     |           |
| 28 | 299061014   | F520.00 | 194281003   | 299061014   | Acute suppurative otitis media                                      | Secondary |
| 29 | 299066016   | F520z00 | 194281003   | 299061014   | Acute suppurative otitis media NOS                                  | Secondary |
| 30 | 4.77471E+15 |         | 194282005   | 2575709017  | Acute suppurative otitis media due to another disease               | Secondary |
| 31 |             |         |             |             |                                                                     |           |
| 32 | 299065017   | F520300 | 194282005   | 299065017   | Acute suppurative otitis media due to disease EC                    | Secondary |
| 33 | 299069011   | F524000 | 194286008   | 299069011   | Bilateral suppurative otitis media                                  | Secondary |
| 34 |             |         |             |             |                                                                     |           |
| 35 | 3.06031E+15 |         | 34790005    | 58063014    | Chronic tubotympanic disease with anterior perforation of ear drum  | Secondary |
| 36 | 490746013   | F513100 | 38394007    | 490746013   | Chronic otitis media with effusion, purulent                        | Secondary |
| 37 |             |         |             |             |                                                                     |           |
| 38 | 8.83741E+14 | F523.99 | 6.94131E+14 | 8.83741E+14 | Chronic purulent otitis media                                       | Secondary |
| 39 | 490749018   | F513111 | 38394007    | 490749018   | Chronic secretory otitis media, purulent                            | Secondary |
| 40 |             |         |             |             |                                                                     |           |
| 41 | 3.11847E+15 |         | 38394007    | 490750018   | Otitis media with effusion - purulent                               | Secondary |
| 42 |             |         |             |             |                                                                     |           |
| 43 |             |         |             |             |                                                                     |           |
| 44 |             |         |             |             |                                                                     |           |
| 45 |             |         |             |             |                                                                     |           |
| 46 |             |         |             |             |                                                                     |           |

|    |             |         |             |             |                                                                                            |           |
|----|-------------|---------|-------------|-------------|--------------------------------------------------------------------------------------------|-----------|
| 1  |             |         |             |             |                                                                                            |           |
| 2  | 1.16801E+14 | F52..00 | 39288006    | 65880011    | Purulent otitis media                                                                      | Secondary |
| 3  |             |         |             |             |                                                                                            |           |
| 4  | 299068015   | F524.00 | 39288006    | 65880011    | Purulent otitis media NOS                                                                  | Secondary |
| 5  | 3.13204E+15 |         | 39288006    | 65883013    | Suppurative otitis media                                                                   | Secondary |
| 6  |             |         |             |             |                                                                                            |           |
| 7  | 3.17617E+15 |         | 41954005    | 70011017    | Persistent mucosal disease with posterior AND/OR superior marginal perforation of ear drum | Secondary |
| 8  | 8.83741E+14 | F523.99 | 6.94131E+14 | 8.83741E+14 | Chronic purulent otitis media                                                              | Secondary |
| 9  |             |         |             |             |                                                                                            |           |
| 10 | 7.98739E+15 |         | 7.361E+12   | 3022971014  | Perforation of tympanic membrane due to otitis media                                       | Secondary |
| 11 | 504727012   | F511.11 | 81564005    | 504727012   | Chronic secretory otitis media, serous                                                     | Secondary |
| 12 | 135302019   | F511.99 | 81564005    | 8.83691E+14 | Chronic serous otitis media                                                                | Secondary |
| 13 |             |         |             |             |                                                                                            |           |
| 14 | 299024017   | F511z00 | 81564005    | 135302019   | Chronic serous otitis media                                                                | Secondary |
| 15 |             |         |             |             |                                                                                            |           |
| 16 | 3.82626E+15 |         | 81564005    | 504725016   | Glue ear - serous                                                                          | Secondary |
| 17 | 5.55791E+14 | F511.00 | 81564005    | 504726015   | Otitis media with effusion - serous                                                        | Secondary |
| 18 |             |         |             |             |                                                                                            |           |
| 19 | 3.82625E+15 |         | 81564005    | 135305017   | Simple chronic serous otitis media                                                         | Secondary |
| 20 | 299023011   | F511300 | 81564005    | 135302019   | Unilateral chronic serous otitis                                                           | Secondary |
| 21 |             |         |             |             |                                                                                            |           |
| 22 | 5.0338E+15  |         | 232251007   | 347975014   | Recurrent acute suppurative otitis media                                                   | Secondary |
| 23 | 6.01386E+15 |         | 312218008   | 455892014   | Infective otitis media                                                                     | Secondary |
| 24 |             |         |             |             |                                                                                            |           |
| 25 | 11759018    | F512100 | 6485001     | 11759018    | Mucosanguinous chronic otitis media                                                        | Secondary |
| 26 | 7.57612E+15 |         | 703469002   | 3008656010  | Bacterial otitis media                                                                     | Secondary |
| 27 |             |         |             |             |                                                                                            |           |
| 28 | 7.82221E+15 |         | 721742004   | 3325908013  | Otitis media caused by Streptococcus pneumoniae                                            | Secondary |
| 29 | 7.82222E+15 |         | 721742004   | 3325909017  | Streptococcus pneumoniae otitis media                                                      | Secondary |
| 30 |             |         |             |             |                                                                                            |           |
| 31 |             |         |             |             |                                                                                            |           |
| 32 |             |         |             |             |                                                                                            |           |
| 33 |             |         |             |             |                                                                                            |           |
| 34 |             |         |             |             |                                                                                            |           |
| 35 |             |         |             |             |                                                                                            |           |
| 36 |             |         |             |             |                                                                                            |           |
| 37 |             |         |             |             |                                                                                            |           |
| 38 |             |         |             |             |                                                                                            |           |
| 39 |             |         |             |             |                                                                                            |           |
| 40 |             |         |             |             |                                                                                            |           |
| 41 |             |         |             |             |                                                                                            |           |
| 42 |             |         |             |             |                                                                                            |           |
| 43 |             |         |             |             |                                                                                            |           |
| 44 |             |         |             |             |                                                                                            |           |
| 45 |             |         |             |             |                                                                                            |           |
| 46 |             |         |             |             |                                                                                            |           |

## POSt Patient Interview Guide

**Welcome and introduction - Seek verbal consent to continue, reminder of audio-recording of interview (or video recording if on Microsoft Teams), re-cap of project and plan for interview.**

*The study is aiming to understand what it is like for children and young people to live with an ear infection which causes a leaky ear. The interviews will explore your views and we are interested in your experience. It will help us to understand more about children and families' experiences of leaky ears. We also wanted to talk to you about how we might conduct research in the future on leaky ears, and if you think it is acceptable way of doing things. With this information we hope to help change how we treat children and young people with leaky ears.*

*If you do not feel you are able to comment on any area, please say so and we can stop at any time. Do you have any questions before we start?*

1. Patient and carer experience of the condition
2. Patient and carer experience of treatment
3. Identifying in the patient and carer's opinion what is the best sign to use for treatment success

Lay explanation of randomised controlled trial is given by facilitator.

4. Identifying in the patient and carer's opinion on randomisation in a future trial
5. Identifying in the patient and carer's opinion on taking placebo medications
6. Identifying in the patient and carer's opinion on motivators and barriers to participating in a randomised controlled trial

### **Anything not covered?**

Is there anything that we haven't covered in the interview that you think we should know or think about?

**Closing and thanks** - Thank for their time and contribution.

## POST Medical Professional Interview Guide

**Welcome and introduction - Seek verbal consent to continue, and check that all members must interact with patients aged 16 and below with paediatric otorrhoea in daily practice to be eligible to take part. Provide a reminder of the video-recording of focus group (Microsoft Teams) will be saved, re-cap of project and plan for focus group discussion. Perform member check after each question or where necessary.**

*The study is aiming to understand how and why children and young people with PO are treated in primary and secondary care and to understand what treatments are acceptable to medical professionals. We are interested in your perceptions, based on your knowledge and experience. If you do not feel you are able to comment on any area, please say so. Do you have any questions before we start?*

1. Introduction of group members and job role
2. Experiences of managing children and young people with paediatric otorrhoea
3. Normal treatment practices
4. Identifying treatment success
5. Motivations and barriers to participating in a future randomised controlled trial

### **Anything not covered?**

Is there anything that we haven't covered in the focus group that you think we should know or think about?

**Closing and thanks - Thank for their time and contribution.**
