# Supplementary material for: Protocol for the Paediatric Otorrhoea Study (POSt): a multi-methods study to understand the burden of paediatric otorrhoea in the UK
Source: PubMed Central journal article supplement (PMC10481712; doi:10.1136/bmjopen-2023-078052), 2023-09-05
Supplement: bmjopen-2023-078052supp002.pdf [file bmjopen-2023-078052supp002.pdf]

| medcodeid   | readcode | snomedctconceptid | snomedctdescriptionid | Aurum Database                                                                | Coding Selection |
|-------------|----------|-------------------|-----------------------|-------------------------------------------------------------------------------|------------------|
| 8.45868E+15 |          | 1.08256E+15       | 3078540019            | Recurrent acute suppurative otitis media with spontaneous rupture of ear drum | Primary          |
| 253190015   | 1C4Z.00  | 162362000         | 253183013             | Ear discharge symptom NOS                                                     | Primary          |
| 253183013   | 1C4..00  | 162362000         | 253183013             | Ear discharge symptoms                                                        | Primary          |
| 4.5481E+15  |          | 162364004         | 253187014             | Discharge from ear                                                            | Primary          |
| 4.54811E+15 |          | 162364004         | 253188016             | Discharging ear                                                               | Primary          |
| 253186017   | 1C42.00  | 162364004         | 253186017             | Ear discharge present                                                         | Primary          |
| 255616012   | 2D6..00  | 164211000         | 255616012             | O/E - discharge from ear                                                      | Primary          |
| 255623013   | 2D6Z.00  | 164211000         | 255616012             | O/E - ear discharge NOS                                                       | Primary          |
| 4.57677E+15 |          | 164211000         | 2667264011            | On examination - discharge from ear                                           | Primary          |
| 255618013   | 2D62.00  | 164213002         | 255618013             | O/E - serous ear discharge                                                    | Primary          |
| 4.57681E+15 |          | 164213002         | 2667266013            | On examination - serous ear discharge                                         | Primary          |
| 255620011   | 2D64.00  | 164215009         | 255620011             | O/E - purulent ear discharge                                                  | Primary          |
| 4.57685E+15 |          | 164215009         | 2666962013            | On examination - purulent ear discharge                                       | Primary          |
| 5.8754E+15  |          | 300132001         | 1490583015            | Discharge from ear                                                            | Primary          |
| 5.87537E+15 |          | 300132001         | 1477433018            | Ear discharge                                                                 | Primary          |
| 5.87538E+15 |          | 300132001         | 441141019             | Finding of ear discharge                                                      | Primary          |
| 5.87539E+15 |          | 300132001         | 1226738019            | Observation of ear discharge                                                  | Primary          |
| 3.06032E+15 |          | 34790005          | 58064015              | Benign chronic suppurative otitis media with anterior perforation of ear drum | Primary          |
| 3.11845E+15 |          | 38394007          | 490747016             | CSOM - Chronic suppurative otitis media                                       | Primary          |
| 299067013   | F523.00  | 38394007          | 63479018              | Chronic suppurative otitis media                                              | Primary          |
| 299529015   | FyuP200  | 38394007          | 63478014              | [X]Other chronic suppurative otitis media                                     | Primary          |
| 6.22921E+14 | F586011  | 65668001          | 109100010             | Discharge of ear                                                              | Primary          |
| 3.56778E+15 |          | 65668001          | 109101014             | Drainage from external ear canal                                              | Primary          |
| 3.56776E+15 |          | 65668001          | 109096014             | Otorrhea                                                                      | Primary          |
| 109102019   | F586.00  | 65668001          | 109102019             | Otorrhoea                                                                     | Primary          |
| 8.83841E+14 | F586.99  | 65668001          | 8.83841E+14           | Otorrhoea - discharging ear                                                   | Primary          |

|             |         |             |             |                                                                     |           |
|-------------|---------|-------------|-------------|---------------------------------------------------------------------|-----------|
| 299229016   | F586z00 | 65668001    | 109102019   | Otorrhoea NOS                                                       | Primary   |
| 399506010   | F586000 | 65668001    | 109102019   | Unspecified otorrhoea                                               | Primary   |
| 1.27288E+16 |         | 6.94131E+14 | 1.51841E+15 | Chronic suppurative otitis media NOS                                | Primary   |
| 4.60551E+14 | F520100 | 86279000    | 1235118013  | Acute suppurative otitis media - tympanic membrane ruptured         | Primary   |
| 3.90297E+15 |         | 86279000    | 1235119017  | Acute suppurative otitis media with discharge                       | Primary   |
| 3.90295E+15 |         | 86279000    | 143085014   | Acute suppurative otitis media with spontaneous rupture of ear drum | Primary   |
| 5.56821E+14 | F521.00 | 87665008    | 1235262012  | Chronic suppurative otitis media - tubotympanic                     | Primary   |
| 3.92483E+15 |         | 87665008    | 145352014   | Chronic tubotympanic suppurative otitis media                       | Primary   |
| 4.06248E+15 |         | 95803004    | 158677012   | Serous drainage from external ear canal                             | Primary   |
| 4.06249E+15 |         | 95804005    | 158678019   | Purulent drainage from external ear canal                           | Primary   |
| 4.06251E+15 |         | 95805006    | 158679010   | Foul odor drainage from external ear canal                          | Primary   |
| 4.0625E+15  |         | 95805006    | 201783016   | Foul odour drainage from external ear canal                         | Primary   |
| 3.11848E+15 |         | 38394007    | 490751019   | Chronic otitis media with perforation                               | Secondary |
| 3.17615E+15 |         | 41954005    | 70007011    | Chronic atticoantral suppurative otitis media                       | Secondary |
| 5.56811E+14 | F522.00 | 41954005    | 1229812011  | Chronic suppurative otitis media - atticoantral                     | Secondary |
| 4.77469E+15 |         | 194281003   | 299062019   | ASOM - Acute suppurative otitis media                               | Secondary |
| 4.7747E+15  |         | 194281003   | 299064018   | Acute purulent otitis media                                         | Secondary |
| 299061014   | F520.00 | 194281003   | 299061014   | Acute suppurative otitis media                                      | Secondary |
| 299066016   | F520z00 | 194281003   | 299061014   | Acute suppurative otitis media NOS                                  | Secondary |
| 4.77471E+15 |         | 194282005   | 2575709017  | Acute suppurative otitis media due to another disease               | Secondary |
| 299065017   | F520300 | 194282005   | 299065017   | Acute suppurative otitis media due to disease EC                    | Secondary |
| 299069011   | F524000 | 194286008   | 299069011   | Bilateral suppurative otitis media                                  | Secondary |
| 3.06031E+15 |         | 34790005    | 58063014    | Chronic tubotympanic disease with anterior perforation of ear drum  | Secondary |
| 490746013   | F513100 | 38394007    | 490746013   | Chronic otitis media with effusion, purulent                        | Secondary |
| 8.83741E+14 | F523.99 | 6.94131E+14 | 8.83741E+14 | Chronic purulent otitis media                                       | Secondary |
| 490749018   | F513111 | 38394007    | 490749018   | Chronic secretory otitis media, purulent                            | Secondary |
| 3.11847E+15 |         | 38394007    | 490750018   | Otitis media with effusion - purulent                               | Secondary |

|             |         |             |             |                                                                                            |           |
|-------------|---------|-------------|-------------|--------------------------------------------------------------------------------------------|-----------|
| 1.16801E+14 | F52..00 | 39288006    | 65880011    | Purulent otitis media                                                                      | Secondary |
| 299068015   | F524.00 | 39288006    | 65880011    | Purulent otitis media NOS                                                                  | Secondary |
| 3.13204E+15 |         | 39288006    | 65883013    | Suppurative otitis media                                                                   | Secondary |
| 3.17617E+15 |         | 41954005    | 70011017    | Persistent mucosal disease with posterior AND/OR superior marginal perforation of ear drum | Secondary |
| 8.83741E+14 | F523.99 | 6.94131E+14 | 8.83741E+14 | Chronic purulent otitis media                                                              | Secondary |
| 7.98739E+15 |         | 7.361E+12   | 3022971014  | Perforation of tympanic membrane due to otitis media                                       | Secondary |
| 504727012   | F511.11 | 81564005    | 504727012   | Chronic secretory otitis media, serous                                                     | Secondary |
| 135302019   | F511.99 | 81564005    | 8.83691E+14 | Chronic serous otitis media                                                                | Secondary |
| 299024017   | F511z00 | 81564005    | 135302019   | Chronic serous otitis media                                                                | Secondary |
| 3.82626E+15 |         | 81564005    | 504725016   | Glue ear - serous                                                                          | Secondary |
| 5.55791E+14 | F511.00 | 81564005    | 504726015   | Otitis media with effusion - serous                                                        | Secondary |
| 3.82625E+15 |         | 81564005    | 135305017   | Simple chronic serous otitis media                                                         | Secondary |
| 299023011   | F511300 | 81564005    | 135302019   | Unilateral chronic serous otitis                                                           | Secondary |
| 5.0338E+15  |         | 232251007   | 347975014   | Recurrent acute suppurative otitis media                                                   | Secondary |
| 6.01386E+15 |         | 312218008   | 455892014   | Infective otitis media                                                                     | Secondary |
| 11759018    | F512100 | 6485001     | 11759018    | Mucosanguinous chronic otitis media                                                        | Secondary |
| 7.57612E+15 |         | 703469002   | 3008656010  | Bacterial otitis media                                                                     | Secondary |
| 7.82221E+15 |         | 721742004   | 3325908013  | Otitis media caused by Streptococcus pneumoniae                                            | Secondary |
| 7.82222E+15 |         | 721742004   | 3325909017  | Streptococcus pneumoniae otitis media                                                      | Secondary |
